# Supplementary material for: Genome Wide Association Mapping of Root Traits in the Andean Genepool of Common Bean (Phaseolus vulgaris L.) Grown With and Without Aluminum Toxicity
Source: PubMed Central journal article supplement (PMC8269929; doi:10.3389/fpls.2021.628687), 2021-06-25

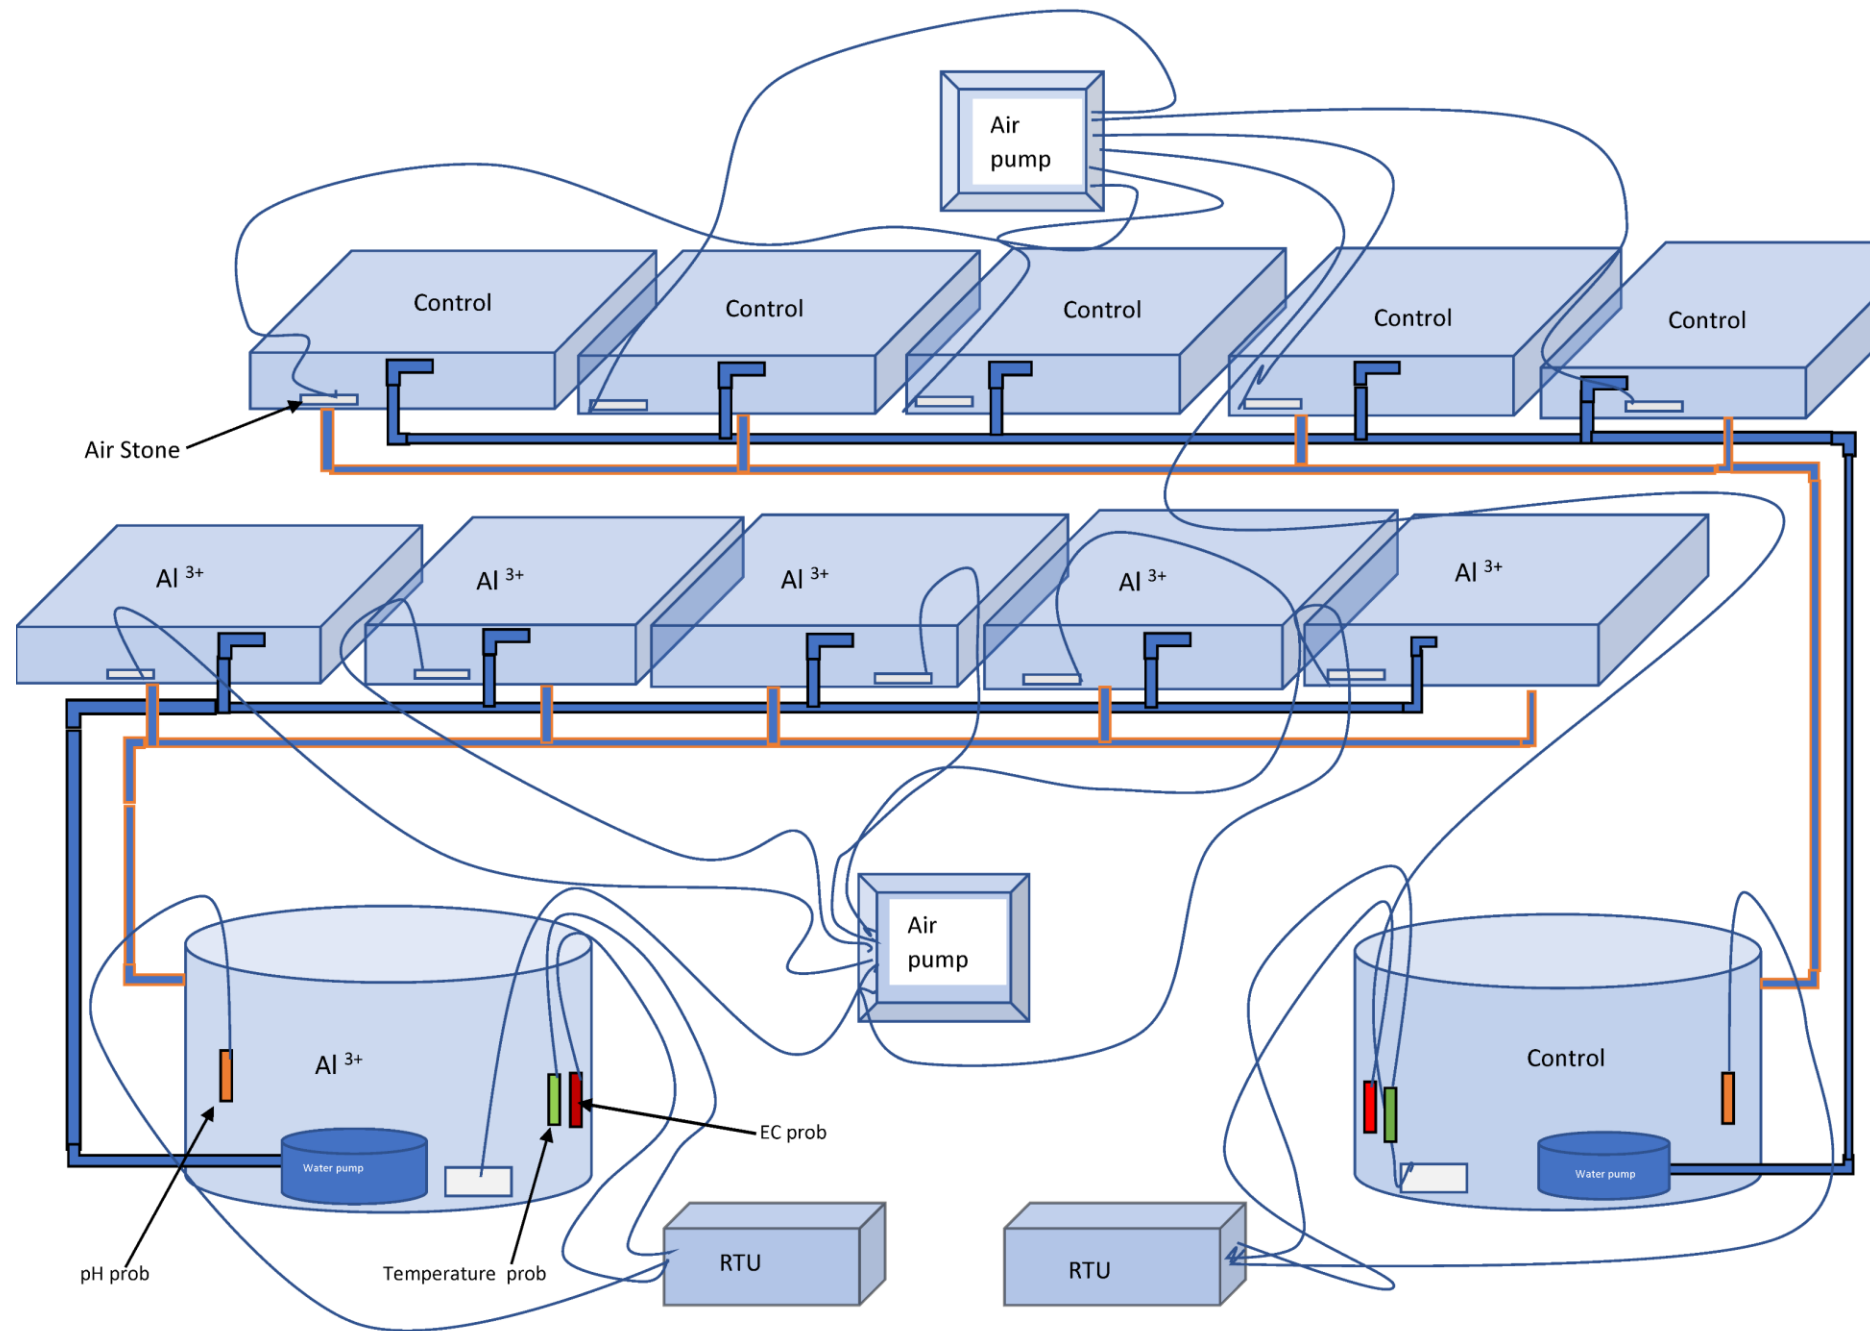

Supplement: Image_1.pdf [file Image_1.pdf]
