# Supplementary material for: Genome Wide Association Mapping of Root Traits in the Andean Genepool of Common Bean (Phaseolus vulgaris L.) Grown With and Without Aluminum Toxicity
Source: PubMed Central journal article supplement (PMC8269929; doi:10.3389/fpls.2021.628687), 2021-06-25

Hourly average Temperature, pH and Electrical conductivity around the roots of common bean seedlings grown under Aluminum treatment

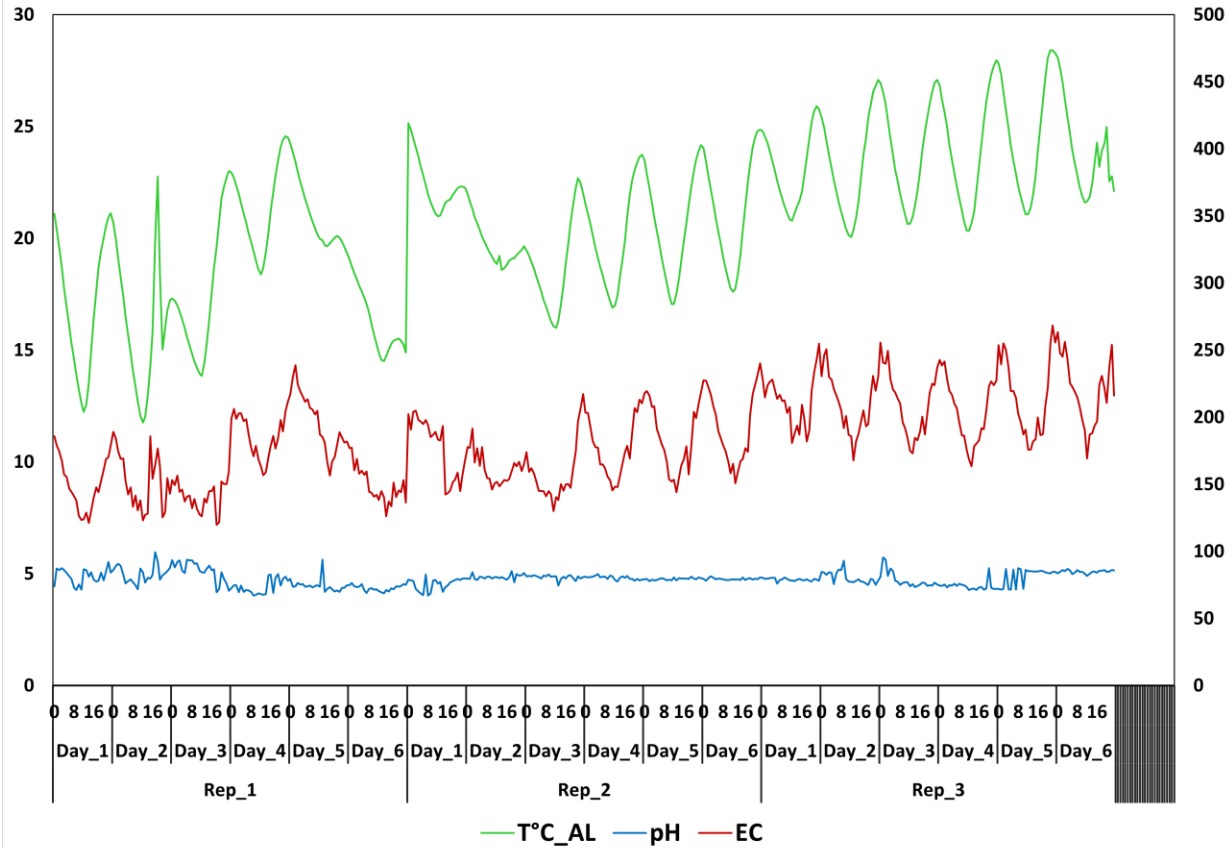

Hourly average Temperature, pH, Electrical conductivity around the roots of common bean seedlings grown under control treatment

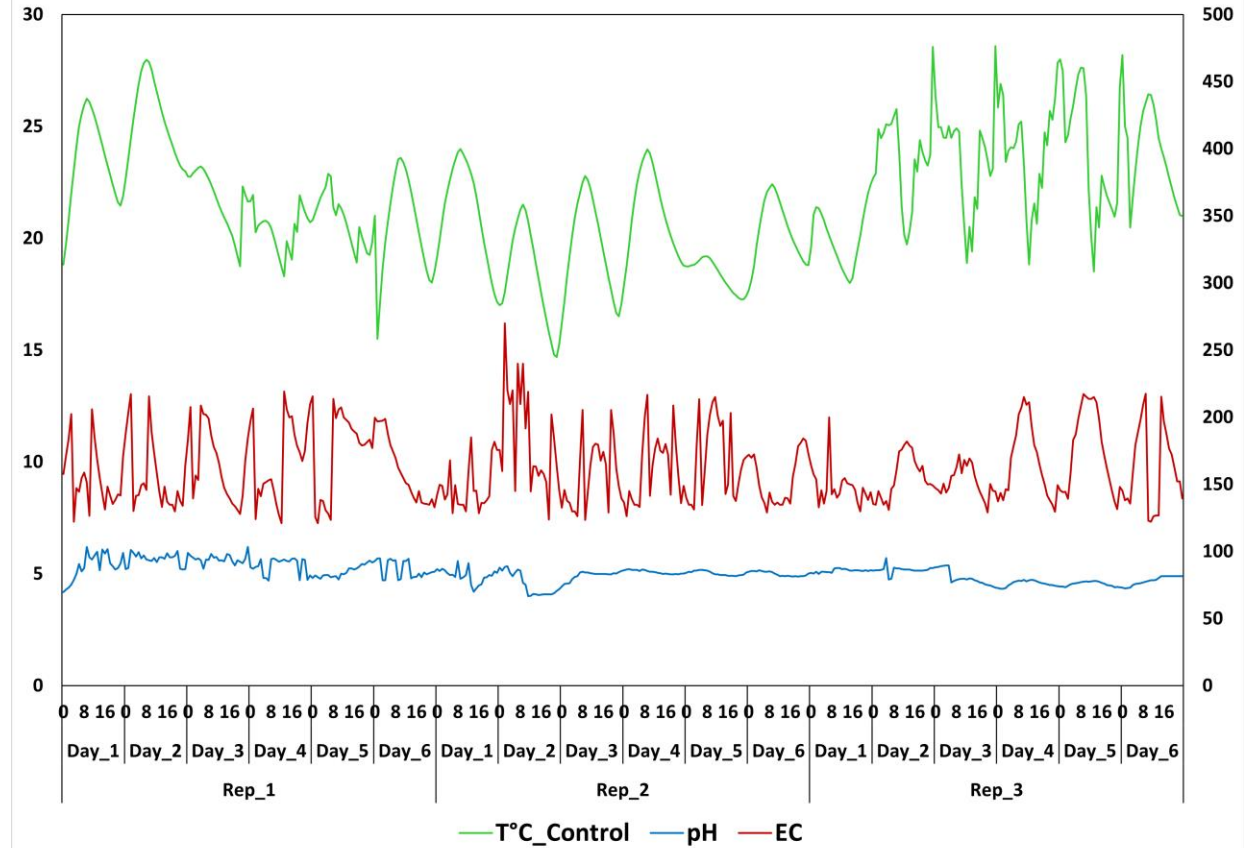

Supplement: Image_2.pdf [file Image_2.pdf]
